# Supplementary material for: A thermo-reversible furfuryl poly(thioether)-b-polysiloxane-b-furfuryl poly(thioether) triblock copolymer as a promising material for high dielectric applications
Source: Royal Society of Chemistry journal article supplement (doi:10.1039/d2py00043a), 2022-01-01
Supplement: d2py00043a1.pdf [file d2py00043a1.pdf]

## Supporting information

# Thermo-reversible Furfuryl Poly(thioether)-*b*-Polysiloxane-*b*-Furfuryl Poly(thioether) Triblock Copolymer as the Promising Material for High Dielectric Applications

Zhanbin Feng<sup>1,2#</sup>, Jiafang Guo<sup>1#</sup>, Xiaohan Cao<sup>1,2#</sup>, Guofei Feng<sup>1</sup>, Zheqi Chen,<sup>3</sup> and  
Xing-Hong Zhang<sup>1,2\*</sup>

1. MOE Key Laboratory of Macromolecular Synthesis and Functionalization, Department of Polymer Science & Engineering, Zhejiang University, Hangzhou, 310027, China.
2. Center of Chemistry for Frontier Technologies, Zhejiang University, Hangzhou, 310027, China.
3. State Key Laboratory of Chemical Engineering, College of Chemical and Biological Engineering, Zhejiang University, Hangzhou, 310027, China.

# Zhanbin Feng, Jiafang Guo and Xiaohan Cao contribute equally to this article.

\* Corresponding authors.

E-mail addresses: [xhzhang@zju.edu.cn](mailto:xhzhang@zju.edu.cn) (X.-H. Zhang)

### ***Structure analysis.***

FT-IR spectra were carried out on a Nicolet 5700 Fourier transformation infrared spectrometer (Thermo Scientific, USA) from 4000  $\text{cm}^{-1}$  to 500  $\text{cm}^{-1}$ . An average of about 32 scans was recorded for each measurement.

$^1\text{H-NMR}$  spectra were carried out on a Bruker Advance DMX 400 MHz spectrometer, the  $\text{CDCl}_3$  was used as the solvent and tetramethylsilane (TMS) was used as an internal standard. The number-average molecular weight ( $M_n$ ) and molecular weight distribution of the copolymer was determined by gel permeation chromatography (GPC) with a Waters 2414 refractive index (RI) detection system equipped with a Waters 1525 isocratic high-performance liquid chromatography (HPLC) pump from Waters Technologies and the experiments were carried out at 40  $^\circ\text{C}$  with tetrahydrofuran at a flow rate of 1.0  $\text{mL min}^{-1}$ .

### ***Electro-actuation performance.***

Electro-actuation performance was conducted using a diaphragm actuator at a prestrain-free condition. The elastomer films were placed on an adhesive acrylate ring with a 10 mm inner diameter, and the ring was stuck tightly onto the top of a diaphragm chamber. A controlled bias air pressure of  $\sim 400$  Pa was used to guide the direction of actuation strain (out of plane). The diameter of the active area was 10 mm (before the actuation and the set of bias air pressure) with two SWCNT electrodes on both sides of an elastomer film. A high-voltage power supply (Trek 610E) was used to drive the actuators. The actuation strain was calculated by analyzing the captured images by Adobe Photoshop.

### ***Quantitative shape memory experiments.***

The quantitative shape memory experiments were carried out in a TA-Q800 DMA device. The sample was stretched to 0.45 N at a rate of 0.1 N/min after reaching equilibrium at 50  $^\circ\text{C}$  for 3 min. Then the sample was rapidly cooled to about -10  $^\circ\text{C}$  and the temperature was kept for 3 min to fix the temporary shape. The force applied to the sample was then removed at a rate of 0.1 N/min until a preload of  $10^{-3}$  N was reached. After equilibrium for about 3 min, the temperature was increased to 50  $^\circ\text{C}$  and kept for

3 min to recover the permanent shape. The fixing ratio ( $R_f$ ) and recovering ratio ( $R_r$ ) were used to reflect the shape memory behavior quantitatively. The  $R_f$  and  $R_r$  were calculated by Equation (1) and (2), respectively.

$$R_f = 100\% \times \frac{\varepsilon}{\varepsilon_{load}}, (1)$$

$$R_r = 100\% \times \frac{\varepsilon - \varepsilon_{rec}}{\varepsilon}, (2)$$

Where  $\varepsilon_{load}$  is the strain under load upon the cooling process,  $\varepsilon$  corresponds the strain when the load is removed before heating,  $\varepsilon_{rec}$  represents the strain when the heating process is accomplished under a stress-free condition.

### ***Dissolution experiments.***

The dissolution experiments of the PSiPGE-BMI were carried out in DMF at room temperature for 72 h and at 160 °C for about 2 h in a three-neck flask, and then, the solution was cooled to about 60 °C. The sample used in the dissolution experiment was cut into pieces and swollen in toluene for 72 h in advance to make sure that the unreacted BMI had been removed completely, and then the sample was dried in vacuum for 24h.

**Table S1.** The recipes for the preparation of PSiFGE-BMI with different crosslinking degree.

|                        | PSiFGE (g) | BMI (g) |
|------------------------|------------|---------|
| <b>PSiFGE-BMI-3/1</b>  | 2.5        | 0.86    |
| <b>PSiFGE-BMI-10/1</b> | 2.8        | 0.287   |
| <b>PSiFGE-BMI-15/1</b> | 2.9        | 0.204   |
| <b>PSiFGE-BMI-20/1</b> | 2.9        | 0.152   |
| <b>PSiFGE-BMI-30/1</b> | 3.1        | 0.107   |

**Table S2.** The molecular weight of the silicon alkoxide and PSiFGE.

|                               | $M_n$ (kg/mol) | $M_w$ (kg/mol) | PDI  |
|-------------------------------|----------------|----------------|------|
| Silicon alkoxide <sup>a</sup> | 2.48           | -              | -    |
| PSiPGE <sup>b</sup>           | 9.72           | 18.3           | 1.88 |

a: measured by MALDI-TOF-Mass; b: measured by GPC.

**Table S3.** The detailed values of the mechanical and dielectric properties for the crosslinked

PSiFGE-BMI.

| Sample          | Tensile strength/MPa<br>a | Elongation at break/% | Elastic modulus (Y)/MPa | $\epsilon'$ | Conductivity ( $10^{-10}$ S/cm) | $\tan \delta$ | $\beta(\text{MPa}^{-1})$ |
|-----------------|---------------------------|-----------------------|-------------------------|-------------|---------------------------------|---------------|--------------------------|
| PSiFGE-BMI-3/1  | 11.17±0.7                 | 83.4±12               | 79.7                    | 5.63        | 6.67                            | 0.027         | 0.07                     |
| PSiFGE-BMI-5/1  | 3.81±0.19                 | 85.7±18               | 12.6                    | 5.68        | 5.96                            | 0.048         | 0.45                     |
| PSiFGE-BMI-10/1 | 0.75±0.07                 | 47.7±1.5              | 2.39                    | 5.77        | 3.78                            | 0.103         | 2.41                     |
| PSiFGE-BMI-15/1 | 0.46±0.08                 | 43.3 ±9               | 1.36                    | 5.93        | 2.44                            | 0.068         | 4.4                      |
| PSiFGE-BMI-20/1 | 0.24±0.05                 | 31±4                  | 0.83                    | 7.64        | 2.17                            | 0.049         | 9.2                      |
| PSiFGE-BMI-30/1 | 0.16±0.04                 | 25.6±5                | 0.6                     | 7.1         | 1.24                            | 0.028         | 11.8                     |

**Table S4.** The detailed values of  $\epsilon$ ,  $\epsilon_{\text{load}}$ ,  $\epsilon_{\text{rec}}$ ,  $R_f$  and  $R_r$  for the consecutive shape memory cycles.

|                              | 1 <sup>st</sup> cycle | 2 <sup>nd</sup> cycle | 3 <sup>rd</sup> cycle |
|------------------------------|-----------------------|-----------------------|-----------------------|
| $\epsilon$ (%)               | 2.85                  | 2.56                  | 2.46                  |
| $\epsilon_{\text{load}}$ (%) | 2.99                  | 2.71                  | 2.59                  |
| $\epsilon_{\text{rec}}$ (%)  | 0.27                  | 0.1                   | 0.052                 |
| $R_f$ (%)                    | 95.3                  | 94.5                  | 95                    |
| $R_r$ (%)                    | 90.5                  | 96.1                  | 97.9                  |

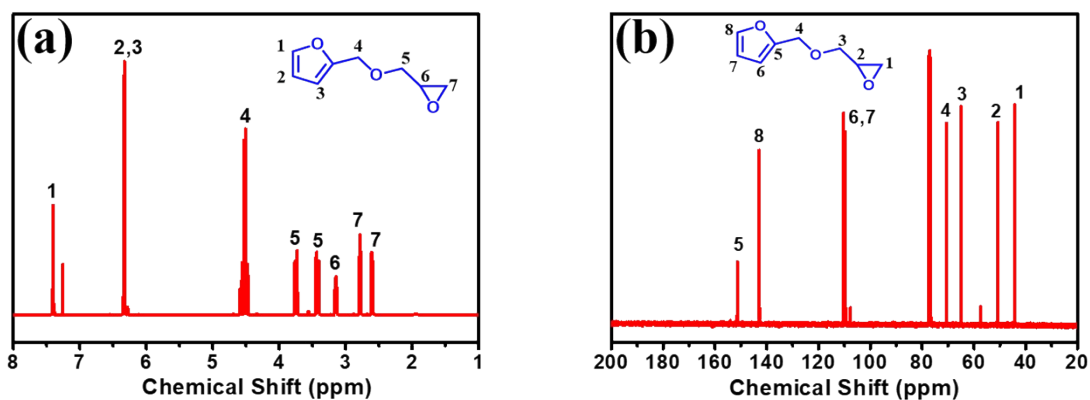

Figure S1. The  $^1\text{H}$ -NMR (a) and  $^{13}\text{C}$ -NMR (b) spectra of FGE.

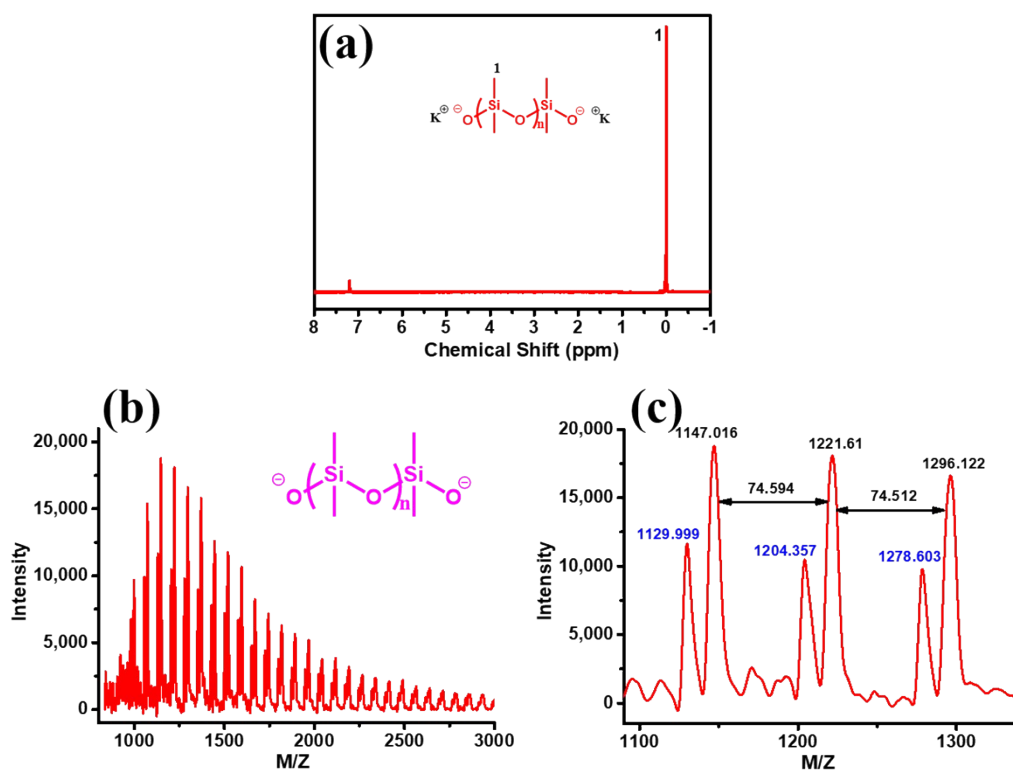

Figure S2. H-NMR (a) and MALDI-TOF MS spectrum (b-c) of silicon alkoxides.

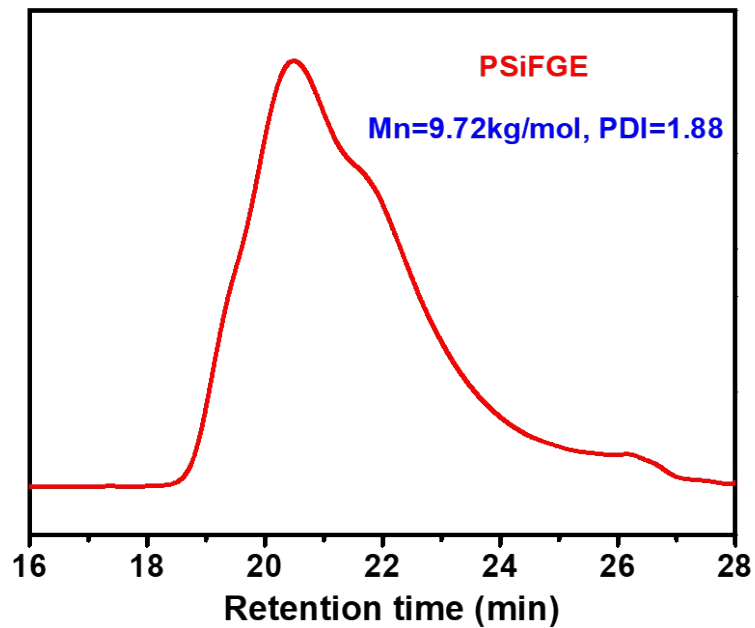

**Figure S3.** GPC curve of PSiFGE from the copolymerization of FGE and COS catalyzed by silicon alkoxides.

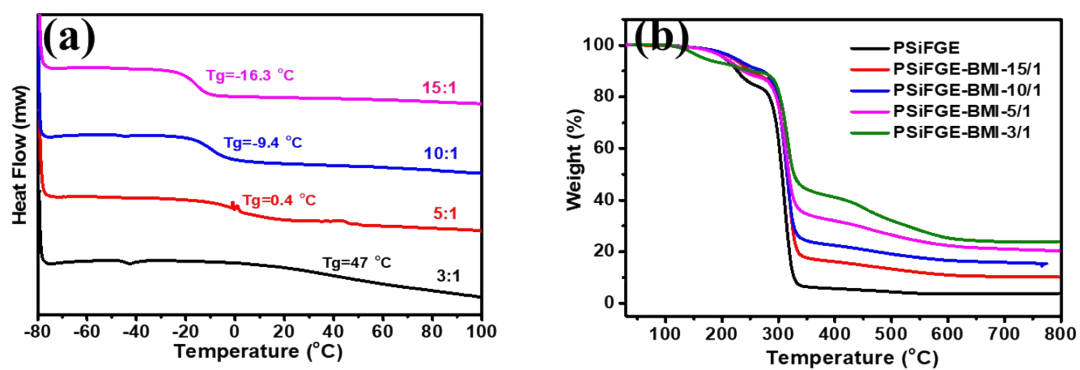

**Figure S4.** (a) DSC curves and (b) TGA curves for PSiFGE-BMI with different crosslinking degree.

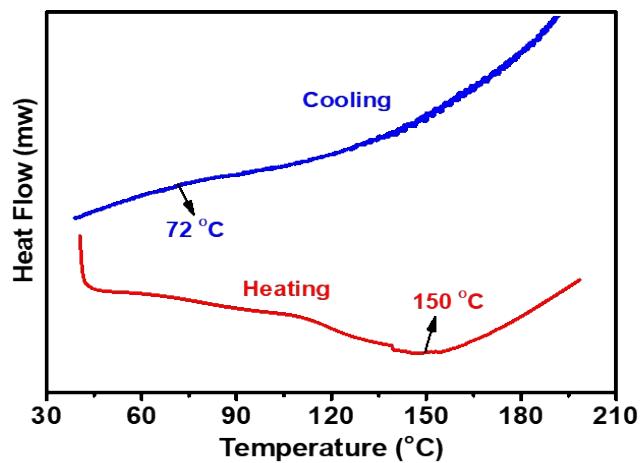

**Figure S5.** The DSC heating-cooling cycle for the crosslinked PSiFGE-BMI sample.

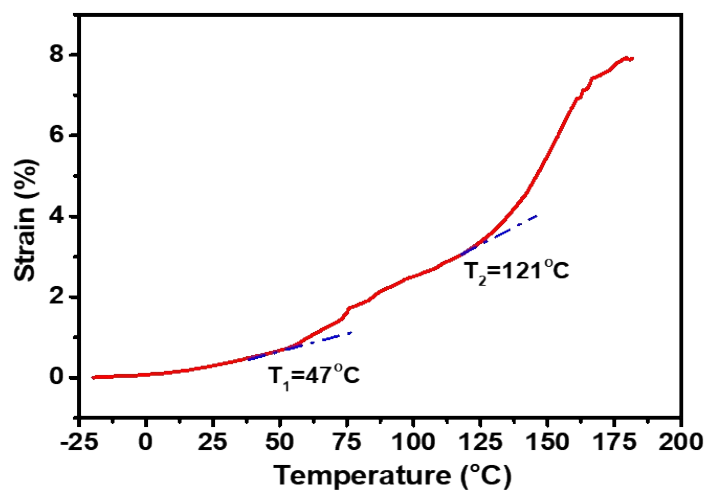

**Figure S6.** Dilatometry experiments for PSiFGE-BMI sample under the heating rate of 3 °C/min.
